# Supplementary material for: Engaging community health workers in maternal and infant death identification in Khayelitsha, South Africa: a pilot study
Source: PubMed Central journal article supplement (PMC7690162; doi:10.1186/s12884-020-03419-4), 2020-11-26
Supplement: 12884_2020_3419_MOESM1_ESM.pdf [file 12884_2020_3419_MOESM1_ESM.pdf]

# Section 1 Maternal Record

Study ID

---

## section\_1a\_information\_on\_maternal\_death\_responden

A1 Initials of verbal autopsy respondent

---

A1a Location of respondent

- Khayelitsha
- Nkanini
- Zwezwe
- Kuyasa
- Harare
- Litha Park
- Site B
- Site C
- Mkhaza
- Makhaya
- Mandela Park
- Town Two
- Green Point
- Ekuphumleni
- Graceland

A2 What is your/the respondent's relationship to the deceased?

- Spouse
- Father/Mother
- Sibling
- Parent in Law
- Sibling in Law
- Neighbour
- Son/Daughter
- Son/Daughter in Law
- Uncle
- Aunt
- Cousin
- Nephew
- Niece
- Grandfather/mother
- Other relative (specify)

A2a Specify relationship if other

---

A3 Gender of the respondent

- Male
- Female

A4 Did you/the respondent live with the deceased in the period leading to her death?

- Yes
- No

A5 Were you present with the deceased at the time of death

- Yes
- No

**section\_1b\_personal\_details\_of\_the\_deceased**

B0 What was the initials of the deceased?

\_\_\_\_\_ (Initials only)

B1 On what date was (NAME) born?

\_\_\_\_\_ (Indicate 01-01-1900 if respondent does not know)

B2 On what date did (NAME) die?

\_\_\_\_\_ (Indicate 01-01-1900 if respondent does not know)

B3 Where did (NAME) die?

- Husband home
- Mother/father's home
- Neighbour/relative's home
- At health facility
- On the way to health facility
- Others (Specify)

B3a Specify if place of death is other

\_\_\_\_\_

B4 How old was (NAME) when she died (in years)

\_\_\_\_\_ (Indicate 999 if respondent does not know)

B5 What was (NAME's) race

- Black African
- White
- Coloured
- Indian
- Asian
- Other (Specify)

B5a Race if other was specified

\_\_\_\_\_

B6 What was (NAME's) highest level of schooling?

- Primary
- Secondary
- Tertiary
- None
- Don't Know

B7 What was (NAME's) occupation, that is, what kind of work did she mainly do?

- Employed
- Unemployed
- Self-employed
- House wife
- Student
- Others (specify)
- Don't Know

B7a Specify other occupation

\_\_\_\_\_

---

B8 What was (NAME's) marital status at the time of death?

- Never married  
 Married  
 Widow  
 Divorced  
 Co-habiting  
 Unknown

---

### section\_1c\_pregnancy\_information

---

C1 Please tell me about (NAME's) health in the six months before she became pregnant this time

\_\_\_\_\_  
(PROMPTS Health problems, illnesses, operations, medications)

---

C2 How many times had (NAME) been pregnant in total?

\_\_\_\_\_  
(Indicate 99 if respondent does not know)

---

C3 Was there any complications in the previous pregnancies?

- Yes  
 No  
 Don't know  
 Refuse to answer

---

C3a Please list/name the complication/s

\_\_\_\_\_

---

C4 How many of these pregnancies resulted in a live born baby?

\_\_\_\_\_  
((If no live birth write "0"), 99 if respondent does not know)

---

C4a How many live births were males?

\_\_\_\_\_  
(Indicate 99 if respondent does not know)

---

C4b How many live births were female?

\_\_\_\_\_  
(Indicate 99 if respondent does not know)

---

C5 How many of these live born babies are still alive?  
(If no living child write "0")

\_\_\_\_\_  
(Indicate 99 if respondent does not know)

---

C5a How many live male born are still alive?

\_\_\_\_\_  
(Indicate 99 if respondent does not know)

---

C5b How many of the live female born are still alive?

\_\_\_\_\_  
(Indicate 99 if respondent does not know)

C7 Infant status:

- Still birth  
 Died immediately after birth  
 Alive 1-7 days  
 Alive 8-28 days  
 Alive after 28 days  
 Pregnancy was terminated  
 Unknown  
 (The condition of the infant that was delivered)

C6 How many stillbirths did she have in her lifetime?  
(If no stillbirth write "0" in total)

\_\_\_\_\_ (Indicate 99 if respondent does not know)

C6a How many male stilbirths? (Indicate "0" if none)

\_\_\_\_\_ (Indicate 99 if respondent does not know)

C6b How many female stillbirths? (indicate "0" if none)

\_\_\_\_\_ (Indicate 99 if respondent does not know)

C8 Please tell me about (NAME's) most recent pregnancy

\_\_\_\_\_ (Health problems (e.g: bleeding, fever, convulsions), illnesses operations, medications?)

C9 Where did (NAME) deliver (last pregnancy)?

- Home  
 PHC/ Clinic  
 Tertiary Hospital  
 Private hospital  
 District hospital  
 In-Transit  
 Any other place(specify)

C9a Specify name of delivery facility if other

\_\_\_\_\_

C10 When did (NAME) start antenatal care during this pregnancy? (Age of pregnancy in months)

\_\_\_\_\_ (Indicate 99 if respondent does not know, 98 if did not attend ANC)

C11 How many times did she attend antenatal care during this pregnancy?

\_\_\_\_\_ (Indicate 99 if respondent does not know)

C12 How many months pregnant was (NAME) when she went into labour?

\_\_\_\_\_ (Indicate 99 if respondent does not know)

C13 Who conducted the delivery- if at home or in health facility

- Trained midwife  
 Doctor  
 Nurse  
 Other (specify)

C13a Specify staff who conducted delivery if other

\_\_\_\_\_

---

C14 Type of delivery

- Normal  
 Caesarean  
 Assisted

---

C15 Outcome of delivery

- Live Single  
 Live Multiple  
 Stillbirth  
 Other

---

C15a Other outcome of delivery

\_\_\_\_\_

---

C16 Please tell me about (NAME's) delivery (if any health problems)

- None  
 Prolonged labour  
 Heavy bleeding  
 Delayed/retained placenta  
 Fever  
 Others (specify)  
 (PROMPTS: Health problems during delivery)

---

C16a Other delivery detail if any problem

\_\_\_\_\_

---

C17 Please tell me about (NAME's) health problems following delivery (if applicable)

- Bleeding  
 Fever  
 Convulsions  
 Offensive Vaginal discharge  
 Hypertension  
 Others (specify)  
 (PROMPTS: Health problems (e.g: illness, operations, medications) where she went for postnatal care, who attended her during postnatal care? )

---

C17a Other postnatal health problem

\_\_\_\_\_

---

C18 Please tell me about the health problems in the last 7 days of (NAME's) life

- Bleeding  
 Fever  
 Convulsions  
 Offensive Vaginal discharge  
 Hypertension  
 Others (specify)  
 (PROMPTS: Health problems (e.g: illness, operations, medications) where she went for postnatal care, who attended her during postnatal care? )

---

C18a Other health problems in the last 7 days of life

\_\_\_\_\_

---

C19 Name and location of nearest government/private facility providing health services

\_\_\_\_\_

---

C20 How many minutes does it take to get to the above facility from the residence.

\_\_\_\_\_

(Time in minutes. Indicate 99 if unknown)

---

C21 Number of institutions visited before death

(Indicate 99 if respondent does not know)

---

C21a List in order from the first to the last if >1 institution was visited

---

C22 How many hours did it take between identifying the problem and deciding to seek care

- < 1 hour  
 1- < 6 hours  
 6-24 hours  
 > 24 hours  
 Does not know
- 

C23 Please tell me what happened between identifying the problem and deciding to seek care?

(PROMPTS: Who made the decision, any delay in making the decision, reasons for delay. Other health care visits (e.g. TBA, sing'anga))

---

C24 How many minutes did it take to get to the health facility?

(Indicate 99 if respondent does not know)

---

C25 Please tell me about the journey to the health facility?

(PROMPTS: How did she travel, any delay in getting to the health facility, reasons for delay)

---

C26 How many minutes did it take to receive care after arriving at the health facility?

(Indicate 99 if respondent does not know)

---

C27 Please tell me about the care (NAME) received at the health facility?

(PROMPTS: Any delay in receiving care, reasons for delay Was there enough staff, drugs, equipment, was she treated with respect? )

---

C28 Please tell me the factors that you think contributed to (NAME's) death

- Severe bleeding  
 Prolonged and obstructed labour  
 High blood pressure/convulsion  
 Termination of pregnancy  
 Severe infection  
 Other (specify)  
 (PROMPTS: Factors which contributed to her poor health, individual factors, family factors, community factors, health facility factors)
- 

C28a Specify other factor contributing to death

---

C29 Please tell me how you think women could be prevented from dying in future

(PROMPTS: Strategies for women, families, communities, health facilities)

C30 Is there anything else you would like to add?

C31 Did (NAME) attend postnatal care clinic

- Yes
- No
- Doesn't know
- Refused to answer

C32 What caused (NAME) death

- Severe bleeding
- Hypertension/Convulsion
- Prolonged/obstructed labour
- Severe bleeding
- Others (Specify)
- Doesn't know

C32a Other cause of death

C33 - Where did the (NAME) die?

- Hospital
- Other health facilities
- Home
- Enroute health facility
- Others (specify)
- Doesn't know
- Refuse to answer

C33a Other place of death

C35 Did the family obtain a death certificate for the deceased.

- Yes
- No
- Don't know
- Refuse to answer

### section 1d: Indirect Cause of Death -history\_of\_injuries\_and\_accidents

D1 Did she suffer from any injury or accident that led to her death?

- Yes
- No
- Doesn't know
- Refused to answer

D2 Was it a road traffic accident?

- Yes
- No
- Doesn't know
- Refused to answer

D3 Was she injured in a non-road transport accident?

- Yes
- No
- Doesn't know
- Refused to answer

---

D4 Was she injured in a fall?

- Yes  
 No  
 Doesn't know  
 Refused to answer
- 

D5 Was there any poisoning?

- Yes  
 No  
 Doesn't know  
 Refused to answer
- 

D5a What was the poison?

\_\_\_\_\_ (This refers to substance that caused the poisoning e.g insecticide)

---

D6 Did she die of drowning?

- Yes  
 No  
 Doesn't know  
 Refused to answer
- 

D7 Was she injured by a bite or sting by venomous animal?

- Yes  
 No  
 Doesn't know  
 Refused to answer
- 

D7a Name of animal that bite or stung the child

\_\_\_\_\_

---

D8 Was she injured by burns/fire?

- Yes  
 No  
 Doesn't know  
 Refused to answer
- 

D9 Was she a subject of violence (suicide, homicide, abuse)?

- Yes  
 No  
 Doesn't know  
 Refused to answer
- 

D9a Type of violence

\_\_\_\_\_

---

D10 Was the mother injured by a force of nature?

- Yes  
 No  
 Doesn't know  
 Refused to answer
- 

D10a which force of nature injured the child?

\_\_\_\_\_

---

D11 Was it electrocution?

- Yes  
 No  
 Doesn't know  
 Refused to answer
- 

D12 Was the injury accidental?

- Yes  
 No  
 Doesn't know  
 Refused to answer
-



---

D13 Did she encounter any other injury?

- Yes
- No
- Doesn't know
- Refused to answer

---

D13a Name of other injury

\_\_\_\_\_

---

D14 Was the injury intentionally inflicted by someone else?

- Yes
- No
- Doesn't know
- Refused to answer

---

D14a who inflicted the intentional injury?

\_\_\_\_\_
